# Supplementary material
Source: PubMed Central journal article supplement (PMC2707223)
Supplement: supp_M109.017947_jbc.M109.017947-1.pdf [file supp_M109.017947_jbc.M109.017947-1.pdf]

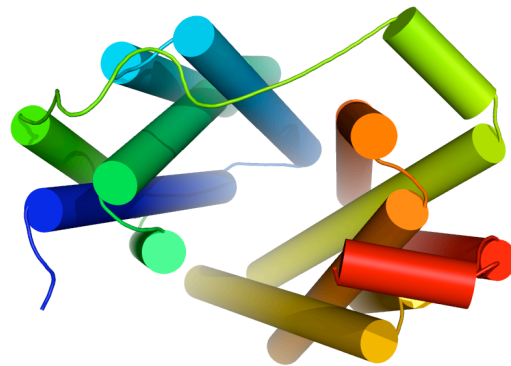

**X-ray structure  
of LacY (1PV7)**

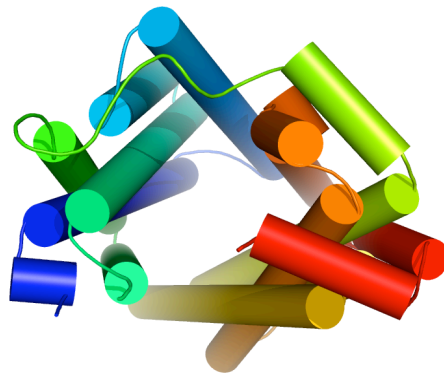

***Ab initio* model  
of LacY**

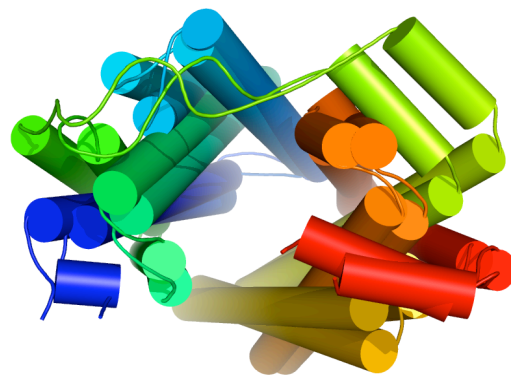

**Superposition of  
1PV7 on *Ab initio* model**

**Fig. S1.** Comparison of the *ab initio* model and the experimentally determined x-ray structure for LacY. The x-ray structure (1PV7), as determined in reference 28 in the text, is displayed on *top*, the *ab initio* model in the *middle*, and a comparison of both structures at the *bottom*. The NH<sub>2</sub>-terminal helix is shown in dark blue and the COOH-terminal helix in red. Structures were displayed using the program PyMOL.
