# Supplementary material
Source: PubMed Central journal article supplement (PMC2707223)
Supplement: supp_M109.017947_jbc.M109.017947-2.pdf [file supp_M109.017947_jbc.M109.017947-2.pdf]

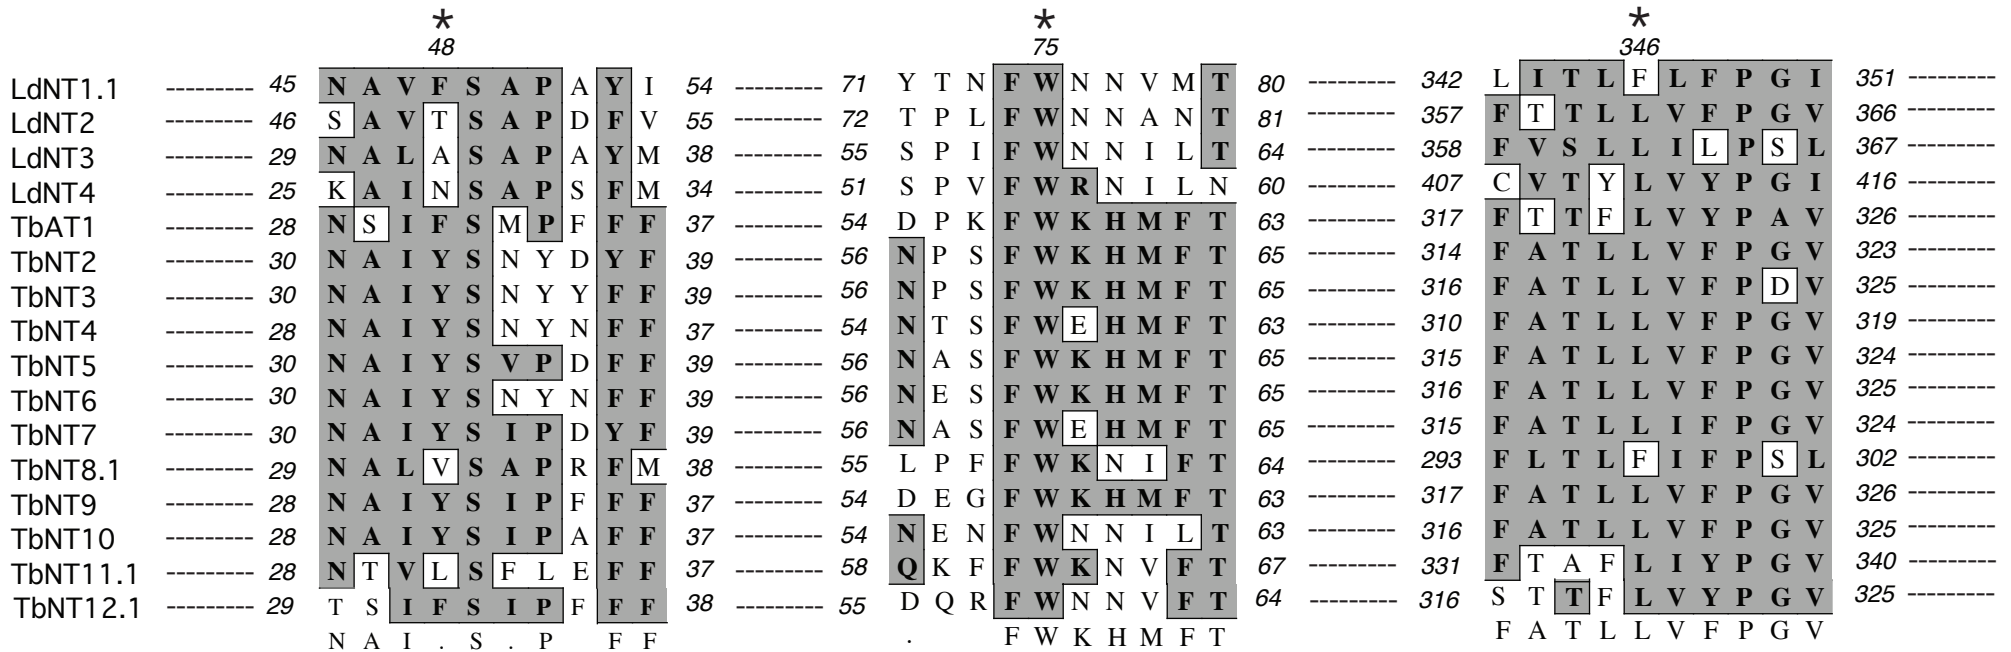

**Fig. S2.** Relevant regions of amino acid sequence from the four ENT family members from *Leishmania donovani* (LdNTs) and the 12 ENT family members from *Trypanosoma brucei* (TbNTs) were aligned using the CLUSTLW algorithm. Conserved amino acids are shown with a gray background, and nonconserved amino acids appear with a white background. Numbers before and after each set of sequences indicate the position of each peptide within the relevant protein sequence. The sequence below the alignments represents a consensus for each region of the alignment. Residues F48, W75, and F346 in LdNT1.1 are indicated by asterisks.

Transporters that accommodate adenosine as a substrate include LdNT1.1, TbAT1, TbAT2, TbAT5, TbAT6, TbAT7, TbAT9, and TbAT10. Substrates for TbAT3 and TbAT4 are currently unknown.
